# Supplementary material for: The Biocontrol Agent Pyemotes zhonghuajia Has the Highest Lethal Weight Ratio Compared with Its Prey and the Most Dramatic Body Weight Change during Pregnancy
Source: MDPI journal article supplement (doi:10.3390/insects12060490), 2021-05-25
Supplement: s1 [file s1]

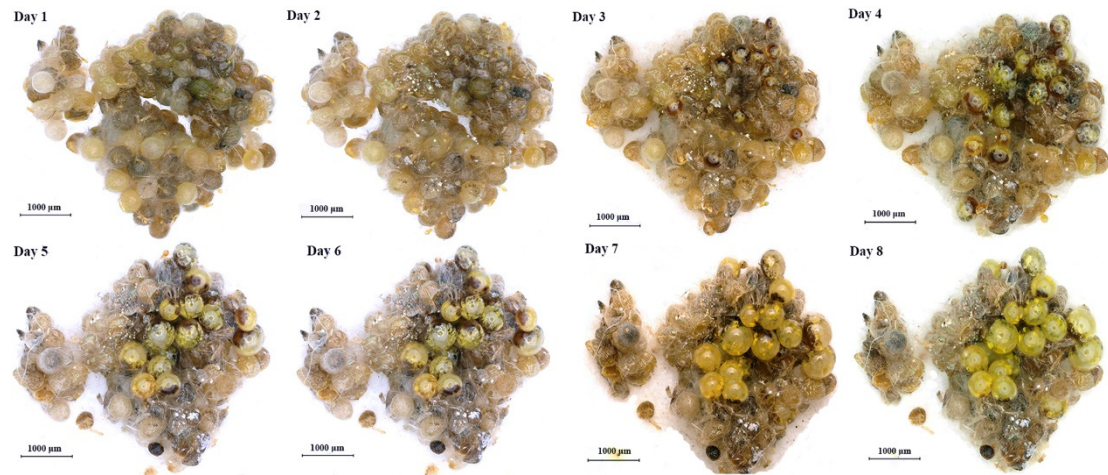

Figure S1. Opisthosoma development of *Pyemotes zhonghuajia* females on *Spodoptera litura* eggs.

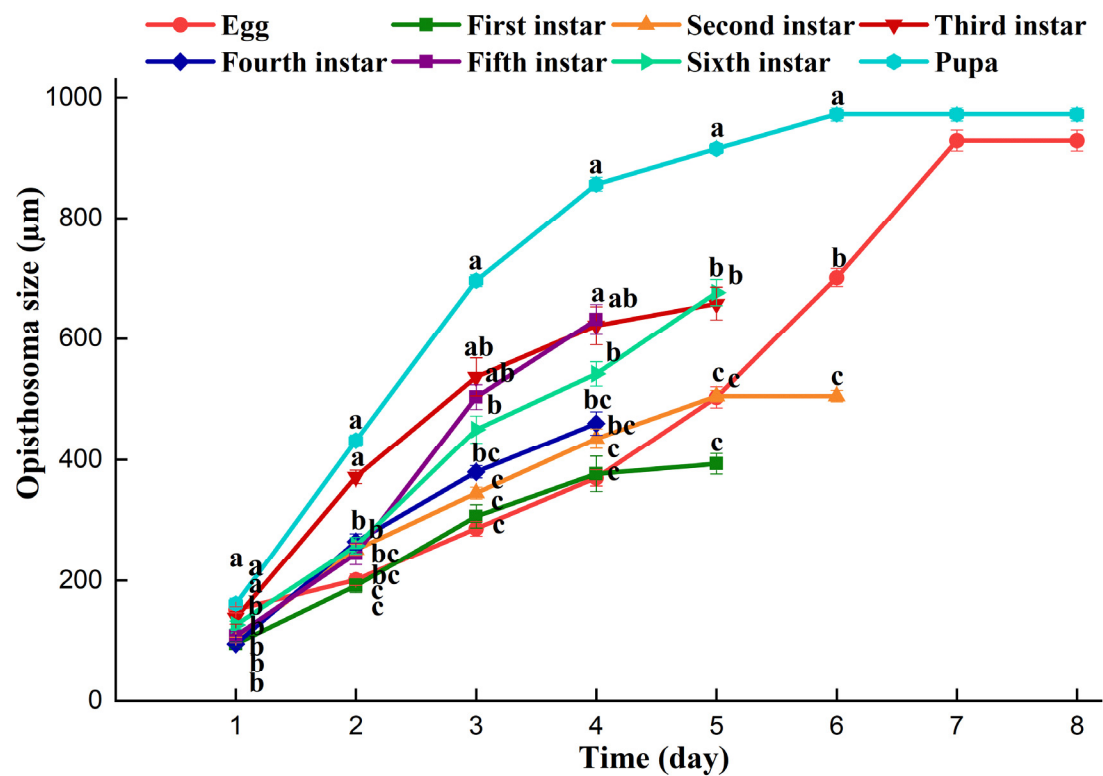

Figure S2. Opisthosoma size of *Pyemotes zhonghuajia* on different stages of *Spodoptera litura*. The different lower-case letters in each time near curve indicate that there are **significant** differences in the opisthosoma size of *P. zhonghuajia* (Tukey's honestly significant difference [HSD] test,  $p < 0.05$ ).

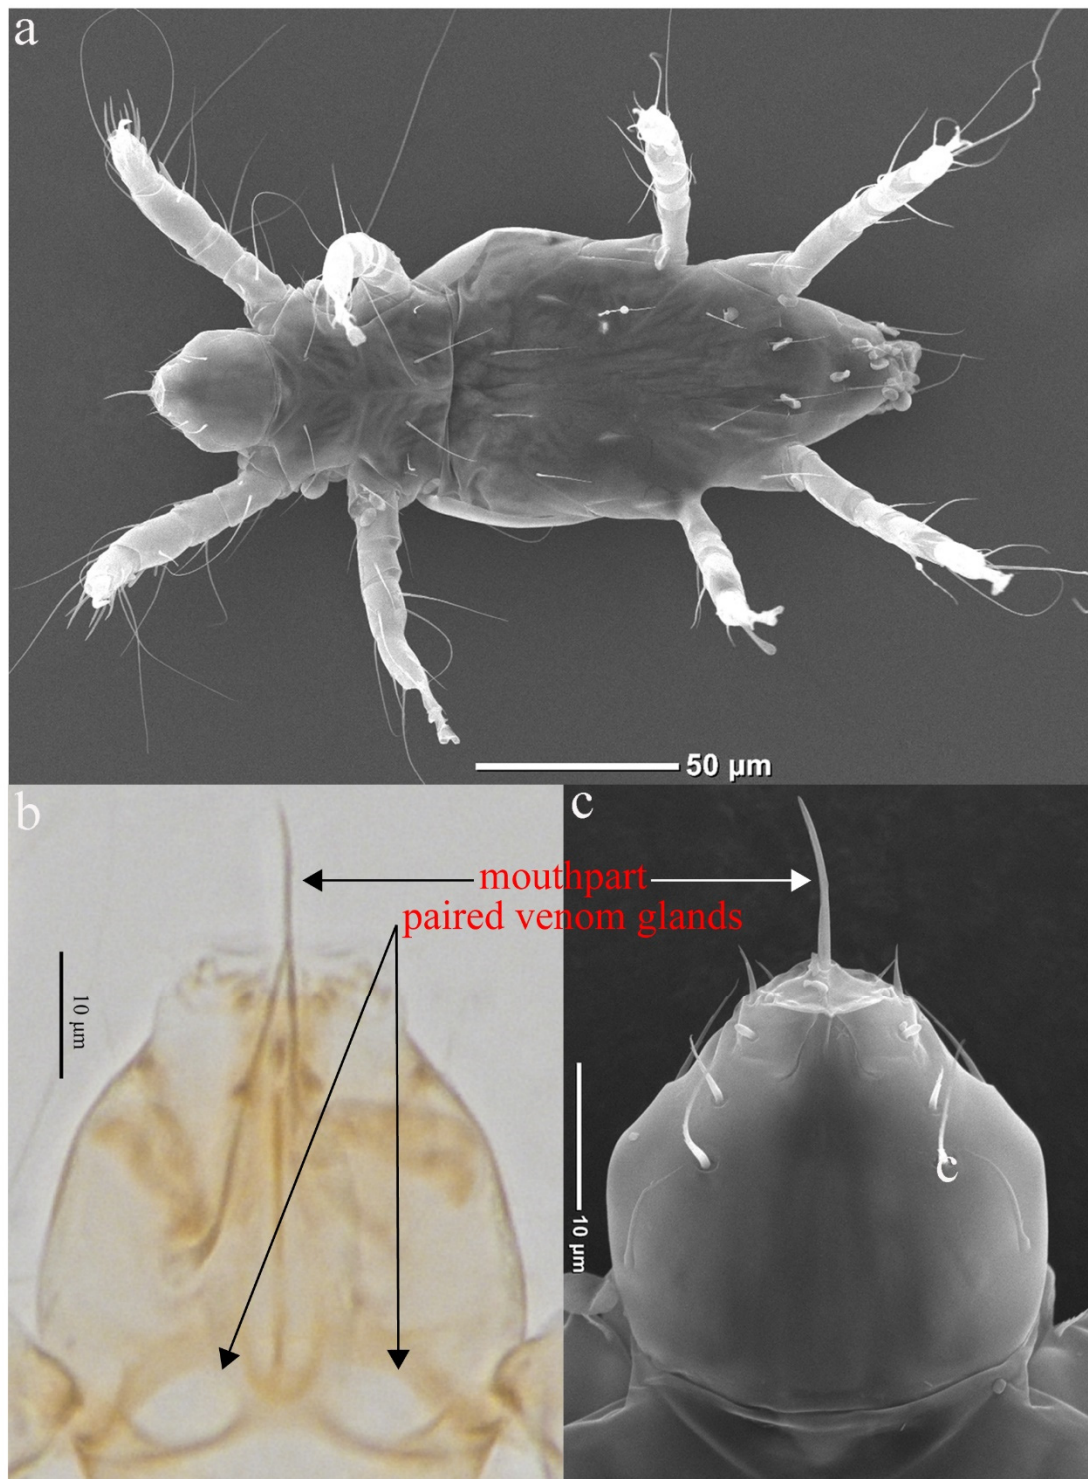

**Figure S3.** (a) A ventral view and (b, c) the pedipalps, including the mouthparts and paired venom glands, of an adult female *Pyemotes zhonghuaia*.
